# Supplementary material
Source: Springer Nature journal article supplement (https://www.springermedizin.de/resource/supplementary/12904_2013_201_MOESM2_ESM.pdf/9517738)

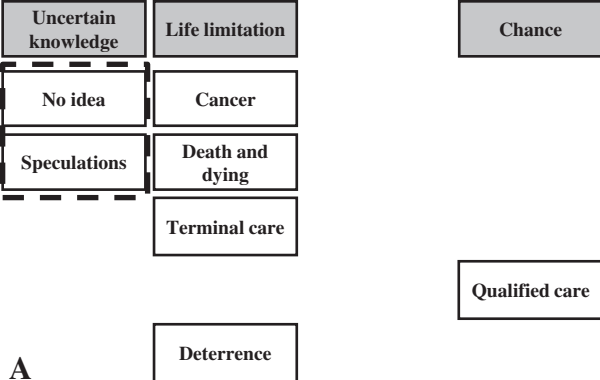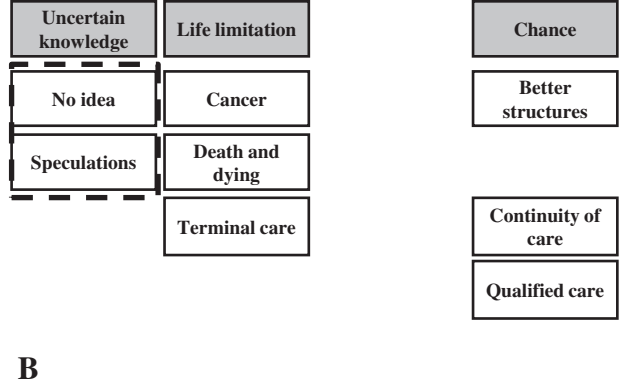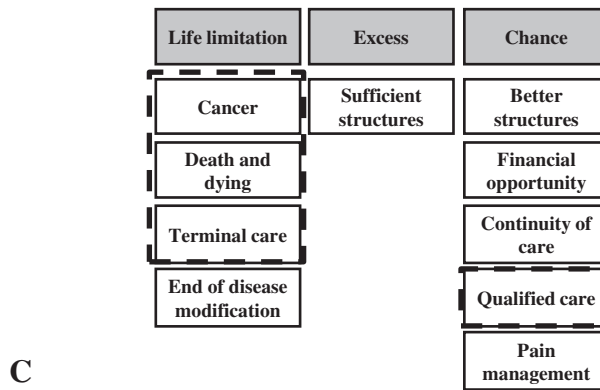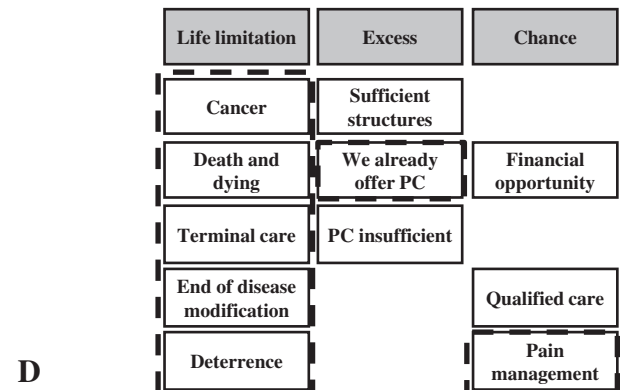

Supplement: MOESM2 [file 9517738]
